# Supplementary material for: Unusual linkage photoisomerization in [Co(NH3)2NO2]2I3Cl single crystals
Source: Royal Society of Chemistry journal article supplement (doi:10.1039/d4ce00734d), 2024-01-01
Supplement: d4ce00734d1.pdf [file d4ce00734d1.pdf]

## SUPPORTING INFORMATION

### Synthesis and crystallization of $[\text{Co}(\text{NH}_3)_5\text{NO}_2]_2\text{I}_3\text{Cl}$

0.475 g of  $[\text{Co}(\text{NH}_3)_5\text{NO}_2]\text{Cl}_2$  were added to 17 ml of distilled water, the mixture was stirred and heated to 50 °C until all  $[\text{Co}(\text{NH}_3)_5\text{NO}_2]\text{Cl}_2$  was dissolved. 1.692 g of  $\text{NH}_4\text{I}$  was then added and the mixture was stirred without heating. After approximately 30 minutes of stirring the solution was cooled to room temperature and placed into the refrigerator and kept overnight at 4 °C. The next day dark red octahedral crystals of approximately 0.5 mm × 0.3 mm × 0.3 mm were observed which were later confirmed as  $[\text{Co}(\text{NH}_3)_5\text{NO}_2]_2\text{I}_3\text{Cl}$ .

### Table S1. Experimental details

For all structures:  $2(\text{CoH}_{15}\text{N}_6\text{O}_2) \cdot 3(\text{I}) \cdot \text{Cl}$ ,  $M_r = 796.37$ , triclinic,  $P-1$ ,  $Z = 2$ . Experiments were carried out at 293 K with Mo Ka radiation using an Esperanto-CrysAlisPro-abstract goniometer imported esperanto images. Absorption was corrected for by multi-scan methods, *CrysAlis PRO* 1.171.42.49 (Rigaku Oxford Diffraction, 2022) Empirical absorption correction using spherical harmonics, implemented in SCALE3 ABSPACK scaling algorithm. H-atom parameters were constrained. Computer programs: *CrysAlis PRO* 1.171.42.49 (Rigaku OD, 2022), *SHELXS2013/1* (Sheldrick, 2015), *SHELXL2019/2* (Sheldrick, 2019).

|                                                                         | $[\text{Co}(\text{NH}_3)_5\text{NO}_2]_2\text{I}_3\text{Cl}$ | $[\text{Co}(\text{NH}_3)_5\text{NO}_2]_{1.38}[\text{Co}(\text{NH}_3)_5\text{ONO}]_{0.62}\text{I}_3\text{Cl}$ |
|-------------------------------------------------------------------------|--------------------------------------------------------------|--------------------------------------------------------------------------------------------------------------|
| Crystal data                                                            |                                                              |                                                                                                              |
| $a, b, c$ (Å)                                                           | 7.1840 (3), 12.5765 (4), 12.7925 (4)                         | 7.1863 (6), 12.5930 (11), 12.7172 (8)                                                                        |
| $\alpha, \beta, \gamma$ (°)                                             | 72.667 (3), 88.833 (3), 82.125 (3)                           | 73.565 (7), 88.489 (6), 82.365 (7)                                                                           |
| $V$ (Å <sup>3</sup> )                                                   | 1092.64 (6)                                                  | 1093.98 (16)                                                                                                 |
| $\mu$ (mm <sup>-1</sup> )                                               | 5.91                                                         | 5.90                                                                                                         |
| Crystal size (mm)                                                       | 0.3 × 0.25 × 0.25                                            | 0.3 × 0.25 × 0.25                                                                                            |
| Data collection                                                         |                                                              |                                                                                                              |
| $T_{\text{min}}, T_{\text{max}}$                                        | 0.378, 1.000                                                 | 0.369, 1.000                                                                                                 |
| No. of measured, independent and observed reflections                   | 9443, 4424, 3761 $\{I > 2\sigma(I)\}$                        | 9215, 4440, 3415 $\{I > 2\sigma(I)\}$                                                                        |
| $R_{\text{int}}$                                                        | 0.021                                                        | 0.034                                                                                                        |
| $(\sin \theta/\lambda)_{\text{max}}$ (Å <sup>-1</sup> )                 | 0.625                                                        | 0.627                                                                                                        |
| Refinement                                                              |                                                              |                                                                                                              |
| $R[F^2 > 2\sigma(F^2)]$ , $wR(F^2)$ , $S$                               | 0.027, 0.071, 1.11                                           | 0.042, 0.104, 1.03                                                                                           |
| No. of reflections                                                      | 4424                                                         | 4440                                                                                                         |
| No. of parameters                                                       | 209                                                          | 219                                                                                                          |
| $\Delta\rho_{\text{max}}, \Delta\rho_{\text{min}}$ (e Å <sup>-3</sup> ) | 0.94, -0.62                                                  | 1.19, -0.89                                                                                                  |

**Table S2. Deformation tensor coefficients multiplied by  $10^6$ . For more information on coefficients see R. S. Bubnova *et al.*, 2013.**

|                 |              |
|-----------------|--------------|
| $\alpha_{11}$   | 268.0439(0)  |
| $\alpha_{22}$   | 12118.48(0)  |
| $\alpha_{33}$   | -8174.515(0) |
| $\mu_{a1}$      | 20.6         |
| $\mu_{b2}$      | 51.7         |
| $\mu_{c3}$      | 28.2         |
| $\alpha_a$      | 848.5079(0)  |
| $\alpha_b$      | 1502.689(0)  |
| $\alpha_c$      | -3714.787(0) |
| $\alpha_\alpha$ | 12694.39(0)  |
| $\alpha_\beta$  | -4063.928(0) |
| $\alpha_\gamma$ | 1547.156(0)  |
| $\alpha_V$      | 4212.009(0)  |

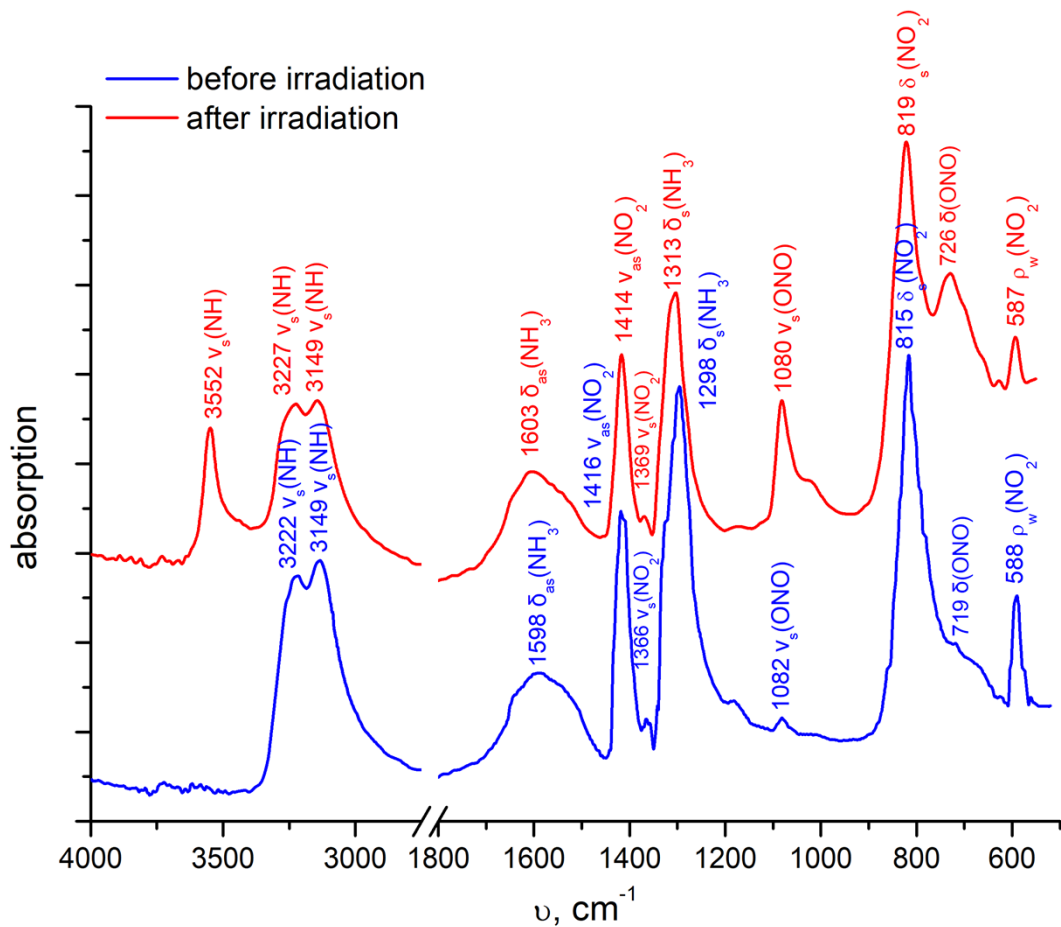

**Figure S1. IR spectra of  $[\text{Co}(\text{NH}_3)_5\text{NO}_2]_2\text{I}_3\text{Cl}$  before and after irradiation.**

**Table S3. Intermolecular contacts with oxygen atoms in CP2 for nitro- and nitrito-forms.**

| Intermolecular contacts in nitro-form (N-O distance, Å / N-H...O angle, °)   |                                    |                                      |                                   |
|------------------------------------------------------------------------------|------------------------------------|--------------------------------------|-----------------------------------|
| N1-H1a...O3 <sup>1-x,1-y,1-z</sup>                                           | N8-H8a...O3 <sup>1-x,1-y,1-z</sup> | N12-H12c...O3 <sup>1-x,1-y,1-z</sup> | N4-H4c...O4 <sup>1-x,2-y,-z</sup> |
| 3.206(6) / 148.9                                                             | 2.972(6) / 105.8                   | 2.962(5) / 112.9                     | 3.131(8) / 121.7                  |
| Intermolecular contacts in nitrito-form (N-O distance, Å / N-H...O angle, °) |                                    |                                      |                                   |
| N1-H1a...O3 <sup>1-x,1-y,1-z</sup>                                           | N8-H8a...O3 <sup>1-x,1-y,1-z</sup> | N12-H12c...O3 <sup>1-x,1-y,1-z</sup> | N4-H4c...O4 <sup>1-x,2-y,-z</sup> |
| 3.267(10) / 142.0                                                            | 2.916(11) / 117.2                  | 2.943(9) / 121.5                     | 3.143(7) / 123.8                  |
